1 **Dominance of ST131 *Escherichia coli* carrying *bla*<sub>CTX-M</sub> in**  
2 **patients with bloodstream infections caused by**  
3 **cephalosporin-resistant strains in Australia, New Zealand**  
4 **and Singapore: whole genome analysis of isolates from a**  
5 **randomised trial**

6  
7 **Authors:**

8 Patrick N. A. Harris<sup>1,2\*</sup>, Nouri L. Ben Zakour<sup>3</sup>, Leah W. Roberts<sup>3</sup>, Alexander M.  
9 Wailan<sup>1,4</sup>, Hosam M. Zowawi<sup>1</sup>, Paul A. Tambyah<sup>5,6</sup>, David C. Lye<sup>5,7,8</sup>, Roland  
10 Jureen<sup>9</sup>, Tau H. Lee<sup>7,8</sup>, Mo Yin<sup>6</sup>, Ezlyn Izharuddin<sup>7</sup>, David Looke<sup>10</sup>, Naomi  
11 Runnegar<sup>10</sup>, Benjamin Rogers<sup>11,12</sup>, Hasan Bhally<sup>13</sup>, Amy Crowe<sup>14</sup>, Mark A.  
12 Schembri<sup>3</sup>, Scott Beatson<sup>3</sup> & David L. Paterson<sup>1,15</sup> on behalf of the MERINO Trial  
13 investigators

14  
15 **Affiliations:**

- 16 1. University of Queensland, UQ Centre for Clinical Research, Royal Brisbane & Women's Hospital, QLD,  
17 Australia  
18 2. Microbiology Department, Central Laboratory, Pathology Queensland, Royal Brisbane & Women's Hospital,  
19 QLD, Australia  
20 3. School of Chemistry and Molecular Biosciences, The University of Queensland, Brisbane, QLD, Australia  
21 4. Infection Genomics, Wellcome Trust Sanger Institute, Wellcome Genome Campus, Hinxton, Cambridge, UK  
22 5. Department of Medicine, Yong Loo Lin School of Medicine, National University of Singapore, Singapore  
23 6. Division of Infectious Diseases, Department of Medicine, National University Hospital, Singapore.  
24 7. Communicable Disease Centre, Institute of Infectious Diseases and Epidemiology, Tan Tock Seng Hospital,  
25 Singapore  
26 8. Lee Kong Chian School of Medicine, Nanyang Technological University, Singapore  
27 9. Department of Laboratory Medicine, Division of Microbiology, National University Hospital, Singapore  
28 10. Infection Management Services, Princess Alexandra Hospital, Brisbane, QLD  
29 11. Centre for Inflammatory Disease, Monash University, Clayton, Victoria  
30 12. Monash Infectious Diseases, Monash Health, Clayton, Victoria, Australia  
31 13. Department of Medicine, North Shore Hospital, Milford, Auckland, New Zealand  
32 14. Department of Infectious Diseases, St Vincent's Hospital, Melbourne, Australia  
33 15. Wesley Medical Research, Wesley Hospital, Toowong, QLD, Australia

34  
35 **\*Corresponding author:**

36 Dr. Patrick N. A. Harris  
37 University of Queensland Centre for Clinical Research  
38 Building 71/918 Royal Brisbane & Women's Hospital Campus, Herston, QLD, 4029  
39 Email: [p.harris@uq.edu.au](mailto:p.harris@uq.edu.au)  
40 Tel: +61 (0) 7 3346 6081

41  
42 **Keywords:** extended-spectrum beta-lactamase, AmpC, plasmids, epidemiology, ST131

43 **Running title:** Whole genome sequencing of ESBL or AmpC-producing *E. coli*

44 **Word count:** 3,274  
45

46 **Synopsis/Abstract**

47 **Objectives:** To characterise multi-drug resistant *Escherichia coli* isolated from patients in  
48 Australia, New Zealand and Singapore with bloodstream infection (BSI).

49 **Methods:** We prospectively collected third-generation cephalosporin resistant (3GC-R) *E.*  
50 *coli* from blood cultures obtained from patients enrolled in a randomised controlled trial.  
51 Whole genome sequencing was used to characterise antibiotic resistance genes, sequence  
52 types (STs), plasmids and phylogenetic relationships. Antibiotic susceptibility was  
53 determined using disk diffusion and Etest.

54 **Results:** A total of 70 *E. coli* were included, of which the majority were ST131 (61.4%). BSI  
55 was most frequently from a urinary source (69.6%), community-associated (62.9%) and in  
56 older patients (median age 71 years [IQR 64-81]). The median Pitt bacteraemia score at  
57 presentation was 1 (IQR 0-2, range 0-3) and ICU admission was infrequent (3.1%). ST131  
58 possessed significantly more acquired resistance genes than non-ST131 ( $p=0.003$ ). Clade  
59 C1/C2 ST131 predominated (30.2% and 53.5% of all ST131 respectively) and these were all  
60 resistant to ciprofloxacin. All clade A ST131 were community-associated. The predominant  
61 ESBL types were *bla*<sub>CTX-M</sub> (78.6% of isolates) and were strongly associated with ST131, with  
62 the majority *bla*<sub>CTX-M-15</sub>. Clade C1 was associated with *bla*<sub>CTX-M-14</sub> and *bla*<sub>CTX-M-27</sub>, whereas  
63 *bla*<sub>CTX-M-15</sub> predominated in clade C2. Plasmid-mediated AmpC (p-AmpC) genes (mainly  
64 *bla*<sub>CMY-2</sub>) were also frequent (17.1%) but were more common with non-ST131 strains  
65 ( $p<0.001$ ). The majority of plasmid replicon types were IncF.

66 **Conclusions:** In a prospective collection of 3GC-R *E. coli* causing BSI in the Australasian  
67 region, community-associated Clade C1/C2 ST131 predominate in association with *bla*<sub>CTX-M</sub>  
68 ESBLs, although a significant proportion of non-ST131 strains carried *bla*<sub>CMY-2</sub>.

69 **Abstract word count:** 249

70

71

72

73 **Introduction**

74 In recent decades, resistance to beta-lactam antibiotics in Enterobacteriaceae has  
75 become increasingly common. Of particular concern has been the rising prevalence  
76 of resistance to 3<sup>rd</sup> generation cephalosporins (3GCs), which includes key agents  
77 such as ceftriaxone, cefotaxime or ceftazidime.<sup>1-3</sup> This phenomenon has largely  
78 arisen from the dissemination of genes encoding extended-spectrum beta-lactamase  
79 (ESBL) or, less frequently, plasmid-mediated AmpC (p-AmpC) enzymes.<sup>4-6</sup> These  
80 resistance genes are often acquired by plasmid transfer and may be associated with  
81 other antibiotic resistance determinants, rendering organisms multi-drug resistant  
82 (MDR).<sup>7</sup> The global emergence of infections caused by ESBL-producing *E. coli*, in  
83 both the community and hospital setting, has been driven by the acquisition of CTX-  
84 M-type ESBL genes (especially *bla*<sub>CTX-M-15</sub>) in the successful pandemic clone of *E.*  
85 *coli*, sequence type 131 (ST131).<sup>8-11</sup> *E. coli* ST131 belong to the B2 phylogenetic  
86 subgroup I, and are mostly serotype O25b:H4.<sup>12</sup> Within ST131, further sublineages  
87 have been delineated according to *fimH* (type 1 fimbrial adhesin, FimH) alleles,  
88 phylogenetic clades (A, B, C1 and C2) and associated resistance genes.<sup>8, 13</sup> A  
89 globally dominant fluoroquinolone-resistant *fimH30* sub-clonal lineage, defined as  
90 *H30-R* (to differentiate from the ancestral fluoroquinolone susceptible *H30* strains) or  
91 clade C, has been described.<sup>8, 14</sup> *H30-R*/clade C strains contain fluoroquinolone  
92 resistance mutations in the chromosomal *gyrA* and *parC* genes<sup>15</sup> and have been  
93 associated with poor clinical outcomes.<sup>16</sup> Within this sub-lineage, a pathogenic  
94 ST131 subclone containing *bla*<sub>CTX-M-15</sub> has been referred to as *H30-Rx*<sup>14</sup> or clade  
95 C2.<sup>8</sup> Specific Incompatibility (Inc) F-type plasmids have also been described in  
96 association with fluoroquinolone-resistant ST131-*H30* clades, with IncF type

97 F1:A2:B20 plasmids associated with the *H30-R/C1* clade and IncF type F2:A1:B-  
98 plasmids associated with the *H30-Rx/C2* clade.<sup>17-19</sup>

99

100 Resistance to beta-lactams mediated by ESBLs drives the use of broader spectrum  
101 antibiotics such as carbapenems (e.g. meropenem)<sup>4</sup>, providing selection pressure for  
102 carbapenem-resistance in gram-negative bacteria. Of great concern has been the  
103 emergence of transmissible carbapenemases in common Enterobacteriaceae.<sup>20</sup> As  
104 part of an international randomised controlled trial of piperacillin-tazobactam (a  
105 potential ‘carbapenem-sparing’ agent) versus meropenem for the treatment of 3GC-  
106 resistant *E. coli* causing bloodstream infection,<sup>21</sup> we aimed to further characterise  
107 these isolates using whole genome sequencing.

108

## 109 **Objectives**

110 To analyse a prospectively collected series of ceftriaxone non-susceptible *E. coli*  
111 isolated from blood cultures in patients in Australia, New Zealand and Singapore  
112 using whole genome sequencing, in order to characterise antibiotic resistance  
113 genes, sequence types, phylogenetic relationships and plasmid structures.

114

## 115 **Methods**

### 116 ***Bacterial isolates and clinical data***

117 *E. coli* isolates were collected prospectively during an international multi-centre  
118 randomised trial comparing treatment options for bloodstream infections caused by  
119 ceftriaxone-resistant *E. coli* or *Klebsiella* spp. (the ‘MERINO’ trial: Australian New  
120 Zealand Clinical Trials Register (ANZCTR), Ref no: ACTRN12613000532707 and  
121 the U.S. National Institute of Health ClinicalTrials.gov register, Ref no:

122 NCT02176122).<sup>21</sup> All *E. coli* blood culture isolates were included from 70 patients  
123 enrolled in the trial for the first 18 months of recruitment (from February 2014 until  
124 August 2015) from 8 hospital sites in 3 countries. To be eligible for the trial, patients  
125 had to have at least one monomicrobial blood culture growing *E. coli*, with resistance  
126 to ceftriaxone, ceftazidime or cefotaxime determined by methods used in the local  
127 laboratories (all of which were internationally accredited). All blood culture isolates  
128 were stored at the recruiting site laboratory at -80°C in cryovials containing glycerol  
129 and nutrient broth and later shipped to the co-ordinating laboratory in Queensland,  
130 Australia. For the purposes of this study, only the first *E. coli* isolated from blood  
131 cultures for each enrolled patient were included in the genomic analysis. Relevant  
132 clinical data were collected and managed using the REDCap<sup>22</sup> electronic data  
133 capture tool hosted at the University of Queensland. Ethics approval for the study  
134 was provided by the Royal Brisbane and Women's Hospital (Ref:  
135 HREC/12/QRBW/440), the National Healthcare Group (NHG) Domain Specific  
136 Review Board (DSRB) in Singapore (NHG DSRB Ref: 2013/00453) and the New  
137 Zealand Health and Disability Ethics Committee (Ref: 14/NTB/52).

138

### 139 ***Phenotypic susceptibility testing***

140 All isolates were tested at the co-ordinating laboratory against a standard panel of  
141 antibiotics used to treat gram-negative infections by disk diffusion according to  
142 EUCAST standards.<sup>23</sup> Agents tested included ceftriaxone, ceftazidime, cefepime,  
143 ceftazidime, aztreonam, ertapenem, gentamicin, amikacin, ciprofloxacin, co-  
144 trimoxazole, and amoxicillin-clavulanate. In addition, minimum inhibitory  
145 concentrations (MICs) for piperacillin-tazobactam, meropenem (the two comparator  
146 drugs used in the trial) and ceftriaxone were determined by Etest (bioMérieux). ESBL

147 production was confirmed using combination disk testing with ceftriaxone and  
148 ceftazidime with and without clavulanate; an increase in zone diameter  $\geq 5$ mm with  
149 the addition of clavulanate confirmed ESBL production.<sup>24</sup>

150

### 151 ***DNA extraction and library preparation***

152 After sub-culture onto LB agar to check for viability and purity, genomic DNA was  
153 extracted using the MoBio Ultrapure kit and quantified by spectrophotometry  
154 (NanoDrop; ThermoFisher) and fluorometry (Qubit; ThermoFisher). Paired-end DNA  
155 libraries were prepared using the Illumina Nextera kit in accordance with the  
156 manufacturer's instructions.

157

### 158 ***Whole genome sequencing***

159 Whole genome sequencing was performed in two batches using Illumina HiSeq (100  
160 bp paired end) and MiSeq (300 bp paired end) at the Australian Genome Research  
161 Facility (AGRF), University of Queensland, St Lucia. MiSeq raw reads were trimmed  
162 conservatively to 150 bp and filtered using Neson (v0.130) to remove Illumina  
163 adaptor sequences, reads shorter than 80 bp and bases below Phred quality 5  
164 (<https://github.com/Victorian-Bioinformatics-Consortium/neson>). Strains were  
165 checked for contamination using Kraken (0.10.5-beta) as implemented through  
166 Nullarbor (default settings).<sup>25</sup>

167

### 168 ***Resistance gene detection, MLST and Plasmid typing***

169 Antibiotic resistance genes were detected by using Abricate (v0.2) with the  
170 ResFinder database against SPAdes assemblies (v3.6.2) as implemented through  
171 the pipeline analysis tool Nullarbor (default settings).<sup>25</sup> Multi-locus sequence typing

172 was undertaken using the mlst tool as implemented through Nullarbor. Plasmid  
173 replicon typing and plasmid multilocus typing for IncF plasmids were performed  
174 using PlasmidFinder and pMLST.<sup>26</sup>

175

#### 176 ***Fluoroquinolone resistance SNP detection***

177 Filtered reads were mapped to the complete ST131 *E. coli* reference strain EC958  
178 (Genbank: HG941718.1) using Bowtie as implemented through Nsoni. Non-  
179 synonymous mutations were identified using Nsoni nway and manually compared  
180 to known mutations in *gyrA* and *parC* associated with quinolone resistance.<sup>27, 28</sup>

181

#### 182 ***Phylogenetic analysis***

183 Reads for all isolates (n=70) were mapped to the complete ST131 reference EC958  
184 (Genbank: HG941718.1)<sup>29</sup> using Nsoni under default settings. Single Nucleotide  
185 Polymorphisms (SNPs) identified between isolates and the reference EC958 were  
186 used to create pseudogenomes for each isolate by substituting the relevant SNPs  
187 into the EC958 chromosome using an in-house script. Multiple sequence alignment  
188 of the pseudogenomes was used as input for Gubbins (v1.3.4)<sup>30</sup> using the  
189 (GTR)GAMMA substitution model to parse recombinant regions. The remaining  
190 211,920 SNPs were used to generate a phylogenetic tree using RAxML (8.2.9)<sup>31</sup>  
191 under the (GTR)GAMMA substitution model with Lewis ascertainment bias  
192 correction and a random seed of 456 (100 bootstraps). An ST131 only tree (n=43)  
193 was also created in the same manner using 2,248 recombination-free SNPs and  
194 1000 bootstraps. Phylogenetic trees and associated meta-data were visualised using  
195 Evolvew.<sup>32</sup>

196

197 **Statistical tests**

198 Data describing patient demographics, phenotypic susceptibility, clinical variables  
199 and genotypic data for all cases were tabulated, with proportions expressed as  
200 percentages and median, mean or inter-quartile ranges calculated as appropriate for  
201 scale variables. Categorical variables were compared using Pearson's  $\chi^2$  test.  
202 Comparisons of mean values in normally distributed data were compared using the t-  
203 test. The Mann-Whitney U test was used for non-parametric data. Statistical analysis  
204 was performed using Stata v.13.1 (StataCorp; TX, USA) and graphical images  
205 prepared using Prism v.7 (GraphPad Software; CA, USA). A p-value <0.05 was  
206 considered significant.

207

208 **Results**

209 A total of 70 *E. coli* bloodstream isolates were included. The background clinical and  
210 demographic details of enrolled patients are summarised in Table 1. The source of  
211 bloodstream infection was most frequently the urinary tract (48/70, 69.6%) and  
212 infections were mostly community-associated (44/70, 62.9%). There was a  
213 predominance of patients reporting Chinese ethnicity (38/70, 54.3% of all cases),  
214 reflecting the demographics of the largest recruiting sites in Singapore. There were  
215 also a greater proportion of male patients (60%), but this was not statistically  
216 significant (p=0.12). Patients tended to be older (median age 71, IQR 64-81 years,  
217 range 20 to 94 years), although only a small proportion (5.8%) were admitted from  
218 nursing homes. The majority of patients had less severe acute illness (median Pitt  
219 score 1, IQR 0 to 2, range 0-3; where a score  $\geq 4$  reflects the presence of critical  
220 illness with high mortality<sup>33</sup>) and relatively low co-morbidity scores (Charlson score



221 median 2, IQR 1 to 4, range 0 to 11) and were infrequently admitted to the ICU  
222 (3.1%).  
223  
224 Strains demonstrated a variable antibiogram according to ST131 clade (see Table  
225 2), but were frequently resistant to trimethoprim-sulphamethoxazole (46/70, 65.7%)  
226 or fluoroquinolones (52/70, 74.3%). There was universal resistance to ciprofloxacin  
227 in clade C1/C2 ST131, compared with only 50% and 48.2% in clade A and non-  
228 ST131 strains respectively ( $p < 0.001$ ). Resistance to aminoglycosides was variable,  
229 with (25/70, 35.7%) testing resistant to gentamicin, but none were resistant to  
230 amikacin. By MIC testing, 97.1% (68/70) were susceptible to piperacillin-tazobactam  
231 (median 2mg/L, range 1-24mg/L, IQR 1.5-4; EUCAST breakpoint for susceptibility  $\leq 8$   
232 mg/L<sup>34</sup>) (see supplementary figure 1). All strains were susceptible to meropenem  
233 ( $MIC_{90} = 0.047$  mg/L; median 0.023 mg/L, range 0.012-0.19 mg/L; EUCAST  
234 breakpoint for susceptibility  $\leq 2$  mg/L<sup>34</sup>), although one strain (MER-86) was non-  
235 susceptible to ertapenem. The majority (90.1%) demonstrated ceftriaxone MICs  $\geq 32$   
236 mg/L (range 0.064 to  $\geq 32$  mg/L; median  $\geq 32$  mg/L,  $MIC_{90}$  and  $MIC_{50} \geq 32$  mg/L). Two  
237 strains, which were susceptible to ceftriaxone by MIC, were resistant to ceftazidime.  
238 Phenotypic resistance to third-generation cephalosporins could not be detected in  
239 one strain (MER-34) when retested in the co-ordinating laboratory, although it was  
240 found to possess TEM-176 ESBL by sequencing.

241

#### 242 ***MLST and phylogenetic grouping of ST131***

243 A clear predominance of strains were ST131 by *in silico* MLST (43/70, 61.4%), with  
244 other strains broadly distributed across a number of other STs (figure 1). The

245 majority of ST131 strains belonged to clades C1 (30.2%) or C2 (53.5%), with strains  
246 from clades B (2.3%) and A (14.0%) seen less frequently.

247

### 248 ***SNPs and phylogenetic relationships of ST131***

249 All clade A ST131 were community-associated, with a mixture of community and  
250 healthcare-associated infections observed for strains in clades C1 and C2. There  
251 was evidence of clustering of closely related strains within certain hospitals (e.g.  
252 MER-27/25 in Hospital E; MER-8/10 and MER-37/39 in Hospital A; MER-78/79 in  
253 Hospital B; MER-65/66 in Hospital G) (figure 2), although these represented both  
254 community and healthcare-associated infections. It is also notable that closely  
255 related strains were identified in different countries, emphasising the global  
256 dissemination of ST131. A phylogenetic tree of all *E. coli* strains can be found in  
257 supplementary figure 2.

258

### 259 ***Resistance genes***

260 The median number of acquired resistance genes detected for each isolate was 9.  
261 One strain (MER-90) possessed a total of 17 acquired resistance genes, including  
262 beta-lactamases (*bla*<sub>CMY-2</sub>, *bla*<sub>TEM-1B</sub>), aminoglycoside resistance genes (*aac(3)-IId*-  
263 like, *aadA1*-like, *aadA2*, *aph(3')-Ic*-like, *strA*, *strB*), resistance genes related to folate  
264 metabolism (*dfrA12*, *dfrA14*-like), fluoroquinolones (*qnrS1*), sulphonamides (*sul1*,  
265 *sul2*, *sul3*), tetracyclines (*tet(A)*), phenicols (*floR*-like) and macrolides (*mph(A)*). The  
266 number of acquired antibiotic resistance genes was significantly greater in ST131  
267 than non-ST131 strains ( $p=0.003$ ) (figure 3A). However, the number of resistance  
268 genes did not vary significantly across ST131 clades (supplementary figure 3). The  
269 complete distribution of resistance genes can be found in supplementary dataset 1.

270

271 ***Beta-lactamases***

272 The predominant ESBL genes identified were *bla*<sub>CTX-M</sub>, seen in 78.6% (55/70) of  
273 isolates. The presence of *bla*<sub>CTX-M</sub> was strongly associated with ST131; 95% of  
274 ST131 possessed *bla*<sub>CTX-M</sub> ESBLs, compared with only 56% of non-ST131 ( $p < 0.001$ )  
275 (Table 3). These were either from CTX-M group 9 (*bla*<sub>CTX-M-14</sub>, *bla*<sub>CTX-M-27</sub>) or CTX-M  
276 group 1 (*bla*<sub>CTX-M-15</sub>, *bla*<sub>CTX-M-55</sub>)<sup>35</sup>, with the majority *bla*<sub>CTX-M-15</sub>. Clade C1 ST131  
277 were associated with *bla*<sub>CTX-M-14</sub> and *bla*<sub>CTX-M-27</sub>, whereas *bla*<sub>CTX-M-15</sub> predominated in  
278 clade C2 (figure 3B). Two strains from Singapore (MER-33, MER-34) possessed a  
279 TEM-variant ESBL (*bla*<sub>TEM-176</sub>), of which one was co-harboured with *bla*<sub>CMY-2</sub> (MER-  
280 33). No SHV-group ESBLs were identified in these *E. coli* isolates.

281

282 The second most common group of beta-lactamases with the ability to hydrolyse  
283 third-generation cephalosporins were acquired AmpC beta-lactamase genes, found  
284 in 17.1% (12/70). The presence of acquired AmpC was not clearly associated with  
285 specific STs, but was more common in non-ST131 strains (37.0% vs 4.7%;  
286  $p < 0.001$ ). These were predominantly *bla*<sub>CMY-2</sub>, although a single strain carried *bla*<sub>DHA-  
287 1</sub>. A single clade C2 ST131 strain from Singapore possessed *bla*<sub>CMY-2</sub> (in association  
288 with *bla*<sub>CTX-M-15</sub>) (figure 2). Although *bla*<sub>CMY-2</sub> are usually acquired on plasmids, in 4  
289 strains (3 from Australia [MER-2, MER-4, MER-43] and 1 from Singapore [MER-99])  
290 there was evidence to suggest chromosomal integration. However, due to repetitive  
291 regions surrounding the *bla*<sub>CMY-2</sub> region, the complete context could not be  
292 ascertained in all isolates using short read sequencing alone. Two of the Australian  
293 CMY-2-producing strains [MER-2 and MER-4] were of the same ST and near  
294 identical on SNP analysis suggesting a common exposure source or direct

295 transmission within the healthcare setting, given that their admissions overlapped in  
296 time (but on separate wards). Further details of the genetic context of *bla*<sub>CMY-2</sub> and  
297 *bla*<sub>DHA-1</sub> can be found in supplementary figures 4, 5, 6 and 7.

298

299 Other narrow-spectrum beta-lactamases such as *bla*<sub>OXA-1</sub> or *bla*<sub>TEM-1B</sub> were common  
300 (seen in 30.0% and 34.3% respectively). A single strain [MER-89] possessed *bla*<sub>LAP-</sub>  
301 *2*, and two [MER-86 and MER-110] carried both *bla*<sub>CTX-M</sub> and *bla*<sub>CMY</sub>. No  
302 carbapenemase genes were identified. In one strain [MER-100], resistance to  
303 ceftazidime (but not ceftriaxone) was not clearly explained by resistance gene  
304 profiling, with no beta-lactamase genes identified, although an altered -35 box  
305 (TTGACA) was found in its promotor, which has been associated with  
306 overexpression of the *ampC* promotor.<sup>36</sup> A single strain [MER-86] demonstrated  
307 resistance to ertapenem and was found to have disruption in *ompF*, which has been  
308 associated with reduced susceptibility to ertapenem when associated with broad  
309 spectrum beta-lactamases.<sup>37</sup>

310

### 311 ***Aminoglycoside resistance genes***

312 The presence of aminoglycoside modifying enzymes (AMEs) was common (seen in  
313 76%) and was encountered more frequently in ST131 (86% vs 59%; p=0.011).

314 There were a variety of AME types identified, including those belonging to the *aadA*,  
315 *aac(3)*, *aph(3')* groups, as well as streptomycin resistance genes *strA* and *strB*. No  
316 genes encoding 16S methylase enzymes (e.g. *arm*, *rmt*), which mediate broad class  
317 resistance to aminoglycosides, were detected.

318

### 319 ***Fluoroquinolone resistance genes***

320 Acquired quinolone resistance genes (i.e. those not mediated by SNPs in regions  
321 associated with quinolone-resistance) were seen in 11% (8/70). These genes  
322 included *qnrS1*, *qnrB4*, *qnrB66*-like, *oqxA* or *aac(6')Ib-cr* (which also mediates  
323 aminoglycoside resistance in addition to low-level quinolone resistance). The  
324 presence of these genes was more commonly seen in non-ST131 than ST131 (22%  
325 vs 5%;  $p=0.025$ ).

326

327 All clade C strains (and a single clade A strain [MER-42]) were identical to the  
328 EC958 reference strain with respect to mutations in *parC* and *gyrA* (supplementary  
329 tables 1 and 2). Phenotypic ciprofloxacin resistance was largely congruent with the  
330 presence of SNPs in *parC* and *gyrA* known to be associated with fluoroquinolone  
331 resistance, or the presence of acquired quinolone resistance determinants.  
332 However, in a handful of strains (e.g. MER-34, MER-26) phenotypic ciprofloxacin  
333 resistance was not evident despite the presence of acquired resistance genes (e.g.  
334 *qnrS1*, *aac(6')Ib-cr* or *oqxA/B*). This may reflect the limited sensitivity of disc  
335 diffusion methods to detect low-level quinolone resistance. Certain *gyrA* SNPs (e.g.  
336 83L) were not by themselves associated with phenotypic ciprofloxacin resistance  
337 unless accompanied by additional SNPs (e.g. 87N or 87Y) (supplementary table 2).

338

### 339 ***Sulphonamide and folate pathway resistance genes***

340 Sulphonamide resistance genes (*sul1*, *sul2* or *sul3*) were common, and present in  
341 69% (48/70) of strains, as were folate synthesis pathway (e.g. trimethoprim)  
342 resistance genes (54%, 38/70), such as *dfrA1*, *dfrA7*, *dfrA12*, *dfrA14* and *dfrA17*. The  
343 presence of sulphonamide resistance and trimethoprim resistant genes were more  
344 common in ST131 (81% vs 48%,  $p=0.004$ , and 74% vs 22%,  $p<0.001$ , respectively).

345

### 346 ***Other resistance genes***

347 Genes mediating resistance to tetracyclines (specifically *tet(A)* and *tet(B)*) were seen  
348 in 56% (39/70), but were equally distributed between ST131 and non-ST131. Other  
349 frequently identified resistance genes included those mediating resistance to  
350 chloramphenicol (e.g. *catA*, *florR*) or macrolides (e.g. *mph(A)*).

351

### 352 ***Plasmids***

353 The majority of plasmid replicon types were identified as IncF. According to the  
354 PubMLST scheme ([www.pubmlst.org/plasmid](http://www.pubmlst.org/plasmid)), plasmids seen in clade C1 ST131  
355 were mainly IncF plasmid type F1:A2:B20 (76.9%), with the remainder IncF type  
356 F1:A2:B- or IncI1 types [ST-79 or unknown ST]. Amongst clade C2 ST131, IncF  
357 types F31:A4:B1 or F36:A4:B1 were most common (22.7% and 27.3% respectively),  
358 with IncF type F2:A1:B- plasmids only seen in 18.2% (Figure 2). Only three clade  
359 C2 strains contained IncI1 or IncN plasmids. The full description of plasmid replicon  
360 types detected is provided in supplementary dataset 1.

361

## 362 **Discussion**

363 This prospective collection of ESBL and p-AmpC-producing *E. coli* bloodstream  
364 isolates provides insight into the current clinical and molecular epidemiology of these  
365 infections within Australia, New Zealand and Singapore. The clear predominance of  
366 ST131 carrying CTX-M-type ESBLs is striking and reflects how this pandemic clone  
367 has emerged as a highly successful human pathogen. As has been described  
368 elsewhere, CTX-M-type ESBLs have now displaced TEM- or SHV-type ESBLs in  
369 many parts of the world<sup>10, 38</sup>, and the latter were not seen in this contemporary

370 collection of *E. coli* bloodstream isolates. It is also notable that the majority of cases  
371 were of community-onset, with their origin from the urinary tract and in patients over  
372 the age of 65 years. This also reflects the shifting epidemiology, whereby an  
373 increasing proportion of infections caused by ESBL-producing *E. coli* are community  
374 acquired.<sup>39</sup> This contrasts to previous decades, following the first description of  
375 ESBLs, where nosocomial acquisition was common and TEM and SHV-type EBSLs  
376 predominated.<sup>4</sup>

377

378 Different beta-lactamase genes were associated with certain *E. coli* lineages. As has  
379 been described previously, *bla*<sub>CTX-M-15</sub> was largely restricted to the C2 clade amongst  
380 ST131, whereas *bla*<sub>CTX-M-27</sub> and *bla*<sub>CTX-M-14</sub> were found in clade C1.<sup>8, 40</sup> A second  
381 notable finding is the emerging prevalence of 3GC-R *E. coli* with acquired AmpC as  
382 a cause of bloodstream infections; these were the second most commonly  
383 encountered broad-spectrum beta-lactamase after CTX-M-type ESBLs in this cohort.  
384 Having been previously under-appreciated, p-AmpC enzymes are increasingly  
385 recognised as a prominent mediator of resistance in *E. coli*.<sup>41-45</sup> In this cohort, p-  
386 AmpC (mainly *bla*<sub>CMY-2</sub>) were not associated with ST131 or any other ST. Previous  
387 studies have demonstrated the predominant p-AmpC enzyme amongst *E. coli* has  
388 been CMY-2<sup>41, 44, 46</sup>, with evidence that *bla*<sub>CMY-2</sub> has been mobilised from the  
389 *Citrobacter freundii* chromosome in association with *ISEcp1*.<sup>47</sup> *ISEcp1* was identified  
390 in all but two of the *E. coli* strains carrying *bla*<sub>CMY-2</sub> in our collection, with these  
391 associated with IS 1294 and a truncated *ISEcp1* (supplementary figure 5).

392

393 IncF type plasmids have a host range that is limited to Enterobacteriaceae and  
394 contribute to bacterial fitness via antibiotic resistance and virulence determinants.<sup>48</sup>

395 These plasmids have been associated with the rapid emergence and global spread  
396 of *bla*<sub>CTX-M-15</sub>, as well as genes encoding resistance to aminoglycosides and  
397 fluoroquinolones (e.g. *aac(6′)-Ib-cr*, *qnr*, *armA*, *rmtB*).<sup>48, 49</sup> Similar patterns were also  
398 seen in this study, where the majority of plasmids were of IncF type. There was an  
399 association between *bla*<sub>CTX-M-15</sub>, *bla*<sub>OXA-1</sub>, as well as the AMEs *aac(3)-IIa* and *aac(6′)-*  
400 *Ib-cr* in clade C2 ST131 carrying IncF plasmids, the majority of which came from  
401 patients in Singapore.

402

403 Previous work, mainly including isolates from North America, suggested that the  
404 H30-R/C1 clade of ST131 most commonly carry IncF type F1:A2:B20 plasmids and  
405 the H30-Rx/C2 clade are associated with IncF type F2:A1:B- plasmids.<sup>17-19</sup> In this  
406 cohort, plasmid types were associated with different sub-lineages of ST131. For  
407 instance, IncF type F31:A4:B1 or F36:A4:B1 plasmids were most frequently seen in  
408 clade C2, whereas IncF type F2:A1:B- were only seen in a single clade C1 strain.  
409 These variations may reflect sampling from different geographical locations, rather  
410 than associations with specific *E. coli* lineages.

411

412 This study has some limitations. Enrolment into the clinical trial required  
413 susceptibility to piperacillin-tazobactam at the local testing laboratory, therefore bias  
414 may exist in the selection of strains. In addition, enrolment of patients into a clinical  
415 trial may preclude those with severe comorbidities or early mortality (prior to  
416 randomisation), it is possible that the *E. coli* were obtained from patients with less  
417 severe disease, which may be associated with less virulent strains.

418



419 The MERINO Trial is currently recruiting in an additional 6 countries (Italy, Turkey,  
420 Canada, South Africa, Lebanon and Saudi Arabia) and aims to report in 2018. It is  
421 anticipated that this current work can be augmented by these additional isolates and  
422 provide a global perspective on the molecular epidemiology of contemporary ESBL-  
423 or p-AmpC-producing *E. coli* causing bloodstream infections.

424

425

#### 426 **Acknowledgements**

427 We would like to acknowledge all the members of the study teams from the recruiting  
428 sites. **Royal Brisbane & Women's Hospital:** Tiffany Harris-Brown, Penelope  
429 Lorenc, John McNamara. **Princess Alexandra Hospital:** Neil Underwood, Jared  
430 Eisenmann, James Stewart, Andrew Henderson. **National University Hospital:**  
431 Jaminah Ali, Donald Chiang. **Tan Tock Seng Hospital:** Soh Siew Hwa, Yvonne  
432 Kang, Ong Siew Pei, Ding Ying. **North Shore Hospital:** Umit Holland. **Monash**  
433 **Health:** Tony Korman, Infectious Disease Registrars 2015-2017

434

#### 435 **Sequence data**

436 Raw sequence reads and associated meta-data can have been uploaded to NCBI  
437 (Bioproject Accession number: PRJNA398288).

438

#### 439 **Transparency declarations**

440 PH and SAB have spoken at an educational event sponsored by Pfizer. BR has  
441 consulted for Mayne Pharma and Merck. PAT has received research support from  
442 GSK, Shionogi, Sanofi-Pasteur and Janssen in the last twelve months. DLP has  
443 received honoraria for advisory board participation and speaking at events

444 sponsored by Achaogen, Merck and GlaxoSmithKline. All other authors declare no  
445 conflicts of interest.

446

#### 447 **Contributions of authors**

448 PH wrote the first and final drafts and undertook the laboratory work. AW and HMZ  
449 helped with the whole genome sequencing and NLBZ, LR and SB undertook the  
450 genomic data analysis. All other authors are site investigators for the trial and helped  
451 to recruit patients and collect bacterial isolates. DLP is the chief investigator for the  
452 MERINO study and conceived the concept for the paper with PH, NLBZ, LR and SB.  
453 All authors contributed to the writing of the paper and have approved the final  
454 version.

455

#### 456 **Funding**

457 This project was supported by funding from the Pathology Queensland Study,  
458 Education and Research Committee (SERC), the National University Hospital  
459 Singapore (NUHS) Clinician Researcher Grant, the Australian Society of  
460 Antimicrobials (ASA), the International Society for Chemotherapy (ISC) and the  
461 National Health and Medical Research Council (NHMRC) of Australia  
462 (GNT1067455). PH is supported by the Royal College of Pathologists of Australasia  
463 (RCPA) Foundation Postgraduate Research Fellowship and an Australian  
464 Postgraduate Award (APA) from the University of Queensland. SAB is supported by  
465 an NHMRC Career Development Fellowship (GNT1090456). MAS is supported by  
466 an NHMRC Senior Research Fellowship (GNT1106930).

467

468

469 **References**

- 470 1. World Health Organisation. Antimicrobial Resistance Global Report on surveillance.  
471 Geneva: WHO, 2014.
- 472 2. European Centre for Disease Prevention and Control. Antimicrobial resistance  
473 surveillance in Europe 2014. Annual Report of the European Antimicrobial Resistance  
474 Surveillance Network (EARS-Net). Stockholm: ECDC, 2015.
- 475 3. Centers for Disease Control and Prevention. Antibiotic resistance threats in the  
476 United States. U.S Department of Health and Human Services, 2013.
- 477 4. Paterson DL, Bonomo RA. Extended-spectrum beta-lactamases: a clinical update.  
478 *Clin Microbiol Rev* 2005; **18**: 657-86.
- 479 5. Jacoby GA. AmpC beta-lactamases. *Clin Microbiol Rev* 2009; **22**: 161-82.
- 480 6. Jacoby GA, Munoz-Price LS. The new beta-lactamases. *N Engl J Med* 2005; **352**:  
481 380-91.
- 482 7. Magiorakos AP, Srinivasan A, Carey RB et al. Multidrug-resistant, extensively drug-  
483 resistant and pandrug-resistant bacteria: an international expert proposal for interim  
484 standard definitions for acquired resistance. *Clin Microbiol Infect* 2012; **18**: 268-81.
- 485 8. Petty NK, Ben Zakour NL, Stanton-Cook M et al. Global dissemination of a multidrug  
486 resistant *Escherichia coli* clone. *Proc Natl Acad Sci U S A* 2014; **111**: 5694-9.
- 487 9. Johnson JR, Johnston B, Clabots C et al. *Escherichia coli* Sequence Type ST131 as  
488 the Major Cause of Serious Multidrug-Resistant *E. coli* Infections in the United States.  
489 *Clinical Infectious Diseases* 2010; **51**: 286-94.
- 490 10. Rogers BA, Sidjabat HE, Paterson DL. *Escherichia coli* O25b-ST131: a pandemic,  
491 multiresistant, community-associated strain. *Journal of Antimicrobial Chemotherapy* 2011;  
492 **66**: 1-14.
- 493 11. Nicolas-Chanoine MH, Blanco J Fau - Leflon-Guibout V, Leflon-Guibout V Fau -  
494 Demarty R et al. Intercontinental emergence of *Escherichia coli* clone O25:H4-ST131  
495 producing CTX-M-15.

- 496 12. Nicolas-Chanoine M-H, Bertrand X, Madec J-Y. Escherichia coli ST131, an Intriguing  
497 Clonal Group. *Clinical Microbiology Reviews* 2014; **27**: 543-74.
- 498 13. Johnson JR, Tchesnokova V Fau - Johnston B, Johnston B Fau - Clabots C et al.  
499 Abrupt emergence of a single dominant multidrug-resistant strain of Escherichia coli.
- 500 14. Price LB, Johnson JR, Aziz M et al. The Epidemic of Extended-Spectrum- $\beta$ -  
501 Lactamase-Producing Escherichia coli ST131 Is Driven by a Single Highly Pathogenic  
502 Subclone, H30-Rx. *mBio* 2013; **4**.
- 503 15. Johnson JR, Johnston B, Kuskowski MA et al. Intensity and Mechanisms of  
504 Fluoroquinolone Resistance within the H30 and H30Rx Subclones of Escherichia coli  
505 Sequence Type 131 Compared with Other Fluoroquinolone-Resistant E. coli. *Antimicrob*  
506 *Agents Chemother* 2015; **59**: 4471-80.
- 507 16. Johnson JR, Thuras P, Johnston BD et al. The Pandemic H30 Subclone of  
508 Escherichia coli Sequence Type 131 Is Associated With Persistent Infections and Adverse  
509 Outcomes Independent From Its Multidrug Resistance and Associations With Compromised  
510 Hosts. *Clin Infect Dis* 2016; **62**: 1529-36.
- 511 17. Johnson TJ, Danzeisen JL, Youmans B et al. Separate F-Type Plasmids Have  
512 Shaped the Evolution of the H30 Subclone of Escherichia coli Sequence Type 131.  
513 *mSphere* 2016; **1**.
- 514 18. Phan MD, Forde BM, Peters KM et al. Molecular characterization of a multidrug  
515 resistance IncF plasmid from the globally disseminated Escherichia coli ST131 clone. *PLoS*  
516 *One* 2015; **10**: e0122369.
- 517 19. Kanamori H, Parobek CM, Juliano JJ et al. Genomic Analysis of Multidrug-Resistant  
518 Escherichia coli from North Carolina Community Hospitals: Ongoing Circulation of CTX-M-  
519 Producing ST131-H30Rx and ST131-H30R1 Strains. *Antimicrob Agents Chemother* 2017;  
520 **61**.
- 521 20. Nordmann P, Dortet L, Poirel L. Carbapenem resistance in Enterobacteriaceae: here  
522 is the storm! *Trends Mol Med* 2012; **18**: 263-72.

- 523 21. Harris P, Peleg AY, Iredell J et al. Meropenem versus piperacillin-tazobactam for  
524 definitive treatment of bloodstream infections due to ceftriaxone non-susceptible *Escherichia*  
525 *coli* and *Klebsiella* spp (the MERINO trial): study protocol for a randomised controlled trial.  
526 *Trials* 2015; **16**: 24.
- 527 22. Harris PA, Taylor R, Thielke R et al. Research electronic data capture (REDCap)—A  
528 metadata-driven methodology and workflow process for providing translational research  
529 informatics support. *Journal of Biomedical Informatics* 2009; **42**: 377-81.
- 530 23. European Committee on Antimicrobial Susceptibility Testing. Breakpoint tables for  
531 interpretation of MICs and zone diameters version 5.0. <http://www.eucast.org/>.
- 532 24. European Committee on Antimicrobial Susceptibility Testing. EUCAST guidelines for  
533 detection of resistance mechanisms and specific resistances of clinical and/or  
534 epidemiological importance.  
535 [http://www.eucast.org/fileadmin/src/media/PDFs/EUCAST\\_files/Consultation/](http://www.eucast.org/fileadmin/src/media/PDFs/EUCAST_files/Consultation/) (June 2014,  
536 date last accessed).
- 537 25. Seemann T, Bulach D, Kwong J. Nullarbor. [github.com/tseemann/nullarbor](https://github.com/tseemann/nullarbor).
- 538 26. Carattoli A, Zankari E, García-Fernández A et al. In Silico Detection and Typing of  
539 Plasmids using PlasmidFinder and Plasmid Multilocus Sequence Typing. *Antimicrobial*  
540 *Agents and Chemotherapy* 2014; **58**: 3895-903.
- 541 27. Johnson JR, Tchesnokova V, Johnston B et al. Abrupt emergence of a single  
542 dominant multidrug-resistant strain of *Escherichia coli*. *J Infect Dis* 2013; **207**: 919-28.
- 543 28. Hopkins KL, Davies RH, Threlfall EJ. Mechanisms of quinolone resistance in  
544 *Escherichia coli* and *Salmonella*: recent developments. *Int J Antimicrob Agents* 2005; **25**:  
545 358-73.
- 546 29. Forde BM, Ben Zakour NL, Stanton-Cook M et al. The complete genome sequence  
547 of *Escherichia coli* EC958: a high quality reference sequence for the globally disseminated  
548 multidrug resistant *E. coli* O25b:H4-ST131 clone.

- 549 30. Croucher NJ, Page AJ, Connor TR et al. Rapid phylogenetic analysis of large  
550 samples of recombinant bacterial whole genome sequences using Gubbins. *Nucleic Acids*  
551 *Research* 2015; **43**: e15-e.
- 552 31. Stamatakis A. RAxML version 8: a tool for phylogenetic analysis and post-analysis of  
553 large phylogenies. *Bioinformatics* 2014; **30**: 1312-3.
- 554 32. He Z, Zhang H, Gao S et al. Evolvview v2: an online visualization and management  
555 tool for customized and annotated phylogenetic trees. *Nucleic Acids Research* 2016; **44**:  
556 W236-W41.
- 557 33. Chow JW, Yu VL. Combination antibiotic therapy versus monotherapy for gram-  
558 negative bacteraemia: A commentary. *International Journal of Antimicrobial Agents* 1999;  
559 **11**: 7-12.
- 560 34. European Committee on Antimicrobial Susceptibility Testing. Breakpoint tables for  
561 interpretation of MICs and zone diameters version 6.0. <http://www.eucast.org/>.
- 562 35. Cantón R, González-Alba JM, Galán JC. CTX-M Enzymes: Origin and Diffusion.  
563 *Frontiers in Microbiology* 2012; **3**: 110.
- 564 36. Tracz DM, Boyd DA, Hizon R et al. ampC gene expression in promoter mutants of  
565 cefoxitin-resistant *Escherichia coli* clinical isolates. *FEMS Microbiology Letters* 2007; **270**:  
566 265-71.
- 567 37. Guillon H, Tande D, Mammeri H. Emergence of Ertapenem Resistance in an  
568 *Escherichia coli* Clinical Isolate Producing Extended-Spectrum  $\beta$ -Lactamase AmpC.  
569 *Antimicrobial Agents and Chemotherapy* 2011; **55**: 4443-6.
- 570 38. Canton R, Gonzalez-Alba JM, Galán JC. CTX-M Enzymes: Origin and Diffusion.  
571 *Frontiers in Microbiology* 2012; **3**.
- 572 39. Doi Y, Park YS, Rivera JI et al. Community-associated extended-spectrum beta-  
573 lactamase-producing *Escherichia coli* infection in the United States. *Clin Infect Dis* 2013; **56**:  
574 641-8.
- 575 40. Stoesser N, Sheppard AE, Pankhurst L et al. Evolutionary History of the Global  
576 Emergence of the *Escherichia coli* Epidemic Clone ST131. *MBio* 2016; **7**: e02162.

- 577 41. Tagg KA, Ginn AN, Jiang X et al. Distribution of acquired AmpC beta-lactamase  
578 genes in Sydney, Australia. *Diagn Microbiol Infect Dis* 2015; **83**: 56-8.
- 579 42. Pascual V, Alonso N, Simo M et al. Bloodstream infections caused by Escherichia  
580 coli producing AmpC beta-lactamases: epidemiology and clinical features. *Eur J Clin*  
581 *Microbiol Infect Dis* 2016.
- 582 43. Harris PN. Clinical management of infections caused by Enterobacteriaceae that  
583 express extended-spectrum beta-lactamase and AmpC enzymes. *Semin Respir Crit Care*  
584 *Med* 2015; **36**: 56-73.
- 585 44. Drinkovic D, Morris AJ, Dyet K et al. Plasmid-mediated AmpC beta-lactamase-  
586 producing Escherichia coli causing urinary tract infection in the Auckland community likely to  
587 be resistant to commonly prescribed antimicrobials. *N Z Med J* 2015; **128**: 50-9.
- 588 45. Belmahdi M, Bakour S, Al Bayssari C et al. Molecular characterisation of extended-  
589 spectrum beta-lactamase- and plasmid AmpC-producing Escherichia coli strains isolated  
590 from broilers in Bejaia, Algeria. *J Glob Antimicrob Resist* 2016; **6**: 108-12.
- 591 46. Sidjabat HE, Seah KY, Coleman L et al. Expansive spread of Inc11 plasmids carrying  
592 blaCMY-2 amongst Escherichia coli. *Int J Antimicrob Agents* 2014; **44**: 203-8.
- 593 47. Verdet C, Gautier V Fau - Chachaty E, Chachaty E Fau - Ronco E et al. Genetic  
594 context of plasmid-carried blaCMY-2-like genes in Enterobacteriaceae.
- 595 48. Villa L, Garcia-Fernandez A, Fortini D et al. Replicon sequence typing of IncF  
596 plasmids carrying virulence and resistance determinants. *J Antimicrob Chemother* 2010; **65**:  
597 2518-29.
- 598 49. Carattoli A. Resistance plasmid families in Enterobacteriaceae. *Antimicrob Agents*  
599 *Chemother* 2009; **53**: 2227-38.

600

601

602 **Table 1:** Baseline clinical and demographic variables

| <b>Factor</b>                            | <b>Level</b>              | <b>N (%)</b> |
|------------------------------------------|---------------------------|--------------|
| <b>Region</b>                            | Singapore                 | 44 (63%)     |
|                                          | Brisbane (AUS)            | 13 (19%)     |
|                                          | Melbourne (AUS)           | 8 (11%)      |
|                                          | Auckland (NZ)             | 5 (7%)       |
| <b>Age [years], mean (SD)</b>            |                           | 69.9 (15.2)  |
| <b>Gender</b>                            | Female                    | 28 (40%)     |
|                                          | Male                      | 42 (60%)     |
| <b>Source of Bacteraemia</b>             | Urinary tract infection   | 48 (70%)     |
|                                          | Intra-abdominal infection | 8 (12%)      |
|                                          | Pneumonia                 | 1 (1%)       |
|                                          | Other                     | 9 (13%)      |
|                                          | Unknown                   | 3 (4%)       |
| <b>Acquisition</b>                       | Community-associated      | 44 (63%)     |
|                                          | Healthcare-associated     | 26 (37%)     |
| <b>Pitt score, median (IQR)</b>          |                           | 1 (0, 2)     |
| <b>Charlson Score, median (IQR)</b>      |                           | 2 (1, 4)     |
| <b>Any CTX-M ESBL</b>                    |                           | 55 (79%)     |
| <b>AmpC <math>\beta</math>-lactamase</b> |                           | 12 (17%)     |
| <b>Surgery within 14 days</b>            |                           | 5 (7%)       |
| <b>Central venous catheter</b>           |                           | 6 (9%)       |
| <b>Immune suppression</b>                |                           | 10 (14%)     |
| <b>ICU admission</b>                     |                           | 2 (3%)       |
| <b>Nursing home resident</b>             |                           | 4 (6%)       |
| <b>Total</b>                             |                           | <b>70</b>    |

603 IQR = inter-quartile range, SD = standard deviation, AUS = Australia, NZ = New Zealand, ICU = intensive care  
 604 unit

605

606



607 **Table 2:** Antibiotic resistance profile of *E. coli* strains according to ST-131 clade

| Clade                 | N  | Cephalosporin |            |            |            | BLBLI      |          | Carbapenem |          | Monobactam  | Sulphonamide | Aminoglycoside |          | Quinolone   |
|-----------------------|----|---------------|------------|------------|------------|------------|----------|------------|----------|-------------|--------------|----------------|----------|-------------|
|                       |    | CTX           | CAZ        | FEP        | FOX        | AMC        | PTZ      | MEM        | ETP      | ATM         | SXT          | GM             | AK       | CIP         |
| Non-susceptible N (%) |    |               |            |            |            |            |          |            |          |             |              |                |          |             |
| <b>A</b>              | 6  | 5<br>(83)     | 5<br>(83)  | 5<br>(83)  | 1<br>(17)  | 4<br>(67)  | 0<br>(0) | 0<br>(0)   | 0<br>(0) | 5<br>(83)   | 4<br>(67)    | 3<br>(50)      | 0<br>(0) | 3<br>(50)   |
| <b>B</b>              | 1  | 1<br>(100)    | 1<br>(100) | 1<br>(100) | 0<br>(0)   | 1<br>(100) | 0<br>(0) | 0<br>(0)   | 0<br>(0) | 1<br>(100)  | 1<br>(100)   | 1<br>(100)     | 0<br>(0) | 0<br>(0)    |
| <b>C1</b>             | 13 | 13<br>(100)   | 4<br>(31)  | 12<br>(92) | 1<br>(8)   | 5<br>(38)  | 0<br>(0) | 0<br>(0)   | 0<br>(0) | 12<br>(92)  | 8<br>(62)    | 4<br>(31)      | 0<br>(0) | 13<br>(100) |
| <b>C2</b>             | 23 | 23<br>(100)   | 21<br>(91) | 22<br>(96) | 1<br>(4)   | 21<br>(91) | 2<br>(9) | 0<br>(0)   | 0<br>(0) | 23<br>(100) | 19<br>(83)   | 13<br>(57)     | 0<br>(0) | 23<br>(100) |
| <b>Non-ST131</b>      | 27 | 25<br>(93)    | 22<br>(81) | 14<br>(52) | 10<br>(37) | 20<br>(74) | 0<br>(0) | 0<br>(0)   | 1<br>(4) | 21<br>(78)  | 14<br>(52)   | 4<br>(15)      | 0<br>(0) | 13<br>(48)  |
| <b>All</b>            | 70 | 67<br>(96)    | 53<br>(76) | 54<br>(77) | 13<br>(19) | 51<br>(73) | 2<br>(3) | 0<br>(0)   | 1<br>(1) | 62<br>(89)  | 46<br>(66)   | 25<br>(36)     | 0<br>(0) | 52<br>(74)  |

608 BLBLI = beta-lactam/beta-lactamase inhibitor, CTX=ceftriaxone, CAZ=ceftazidime, FEP=cefepime, FOX=cefoxitin, AMC=amoxicillin-clavulanate, PTZ=piperacillin-tazobactam, MEM=meropenem,  
 609 ETP=ertapenem, ATM=aztreonam, SXT=trimethoprim-sulphamethoxazole, GM=gentamicin, AK=amikacin, CIP=ciprofloxacin.

610

611

612 **Table 3:** Presence of acquired resistance genes by sequence type

| Resistance genes                                  | All strains | ST131     | Non-ST131 | p-value          |
|---------------------------------------------------|-------------|-----------|-----------|------------------|
| <b>CTX-M-type ESBL</b>                            | 56 (79%)    | 41 (95%)  | 14 (52%)  | <b>&lt;0.001</b> |
| <i>CTX-M-14</i>                                   | 8 (11%)     | 5 (12%)   | 3 (11%)   | 0.95             |
| <i>CTX-M-15</i>                                   | 31 (44%)    | 24 (56%)  | 7 (26%)   | <b>0.014</b>     |
| <i>CTX-M-27</i>                                   | 14 (20%)    | 13 (30%)  | 1 (4%)    | <b>0.007</b>     |
| <i>CTX-M-55</i>                                   | 3 (4%)      | 0 (0%)    | 3 (11%)   | <b>0.025</b>     |
| <b>Acquired AmpC <math>\beta</math>-lactamase</b> | 12 (17%)    | 2 (5%)    | 10 (37%)  | <b>&lt;0.001</b> |
| <b>Aminoglycoside modifying enzymes</b>           | 53 (76%)    | 37 (86%)  | 16 (59%)  | <b>0.011</b>     |
| <b>Acquired quinolone resistance</b>              | 8 (11%)     | 2 (5%)    | 6 (22%)   | <b>0.025</b>     |
| <b>Folate pathway resistance</b>                  | 38 (54%)    | 32 (74%)  | 6 (22%)   | <b>&lt;0.001</b> |
| <b>Sulphonamide resistance</b>                    | 48 (69%)    | 35 (81%)  | 13 (48%)  | <b>0.004</b>     |
| <b>Tetracycline resistance</b>                    | 39 (56%)    | 23 (53%)  | 16 (59%)  | 0.64             |
| <b>Total</b>                                      | <b>70</b>   | <b>43</b> | <b>27</b> |                  |

613

614 **Figure Legends**

615 **Figure 1:** *In silico* MLST of ESBL or AmpC-producing *E. coli* isolated from blood, by  
616 region

617 **Figure 2:** Phylogenetic tree of ST131 *E. coli* based on core genome SNPs; clade,  
618 antibiotic resistance, ESBL/p-AmpC type and IncF plasmid type are shown

619

620 Aus = Australia; NZ = New Zealand

621

622 **Figure 3: Panel A |** Number of resistance genes by sequence type; **Panel B |**  
623 Distribution of ESBL and p-AmpC genes across ST131 clades (A, B, C1 and C2) and  
624 non-ST131 *E. coli*

625

626 Only acquired resistance genes detected by whole genome sequencing are shown. MLST = *in silico*

627 multi-locus sequence type, grey bars show means with 95% confidence intervals. Groups were

628 compared using Mann-Whitney U-test; \*\* significant at  $p < 0.005$  level

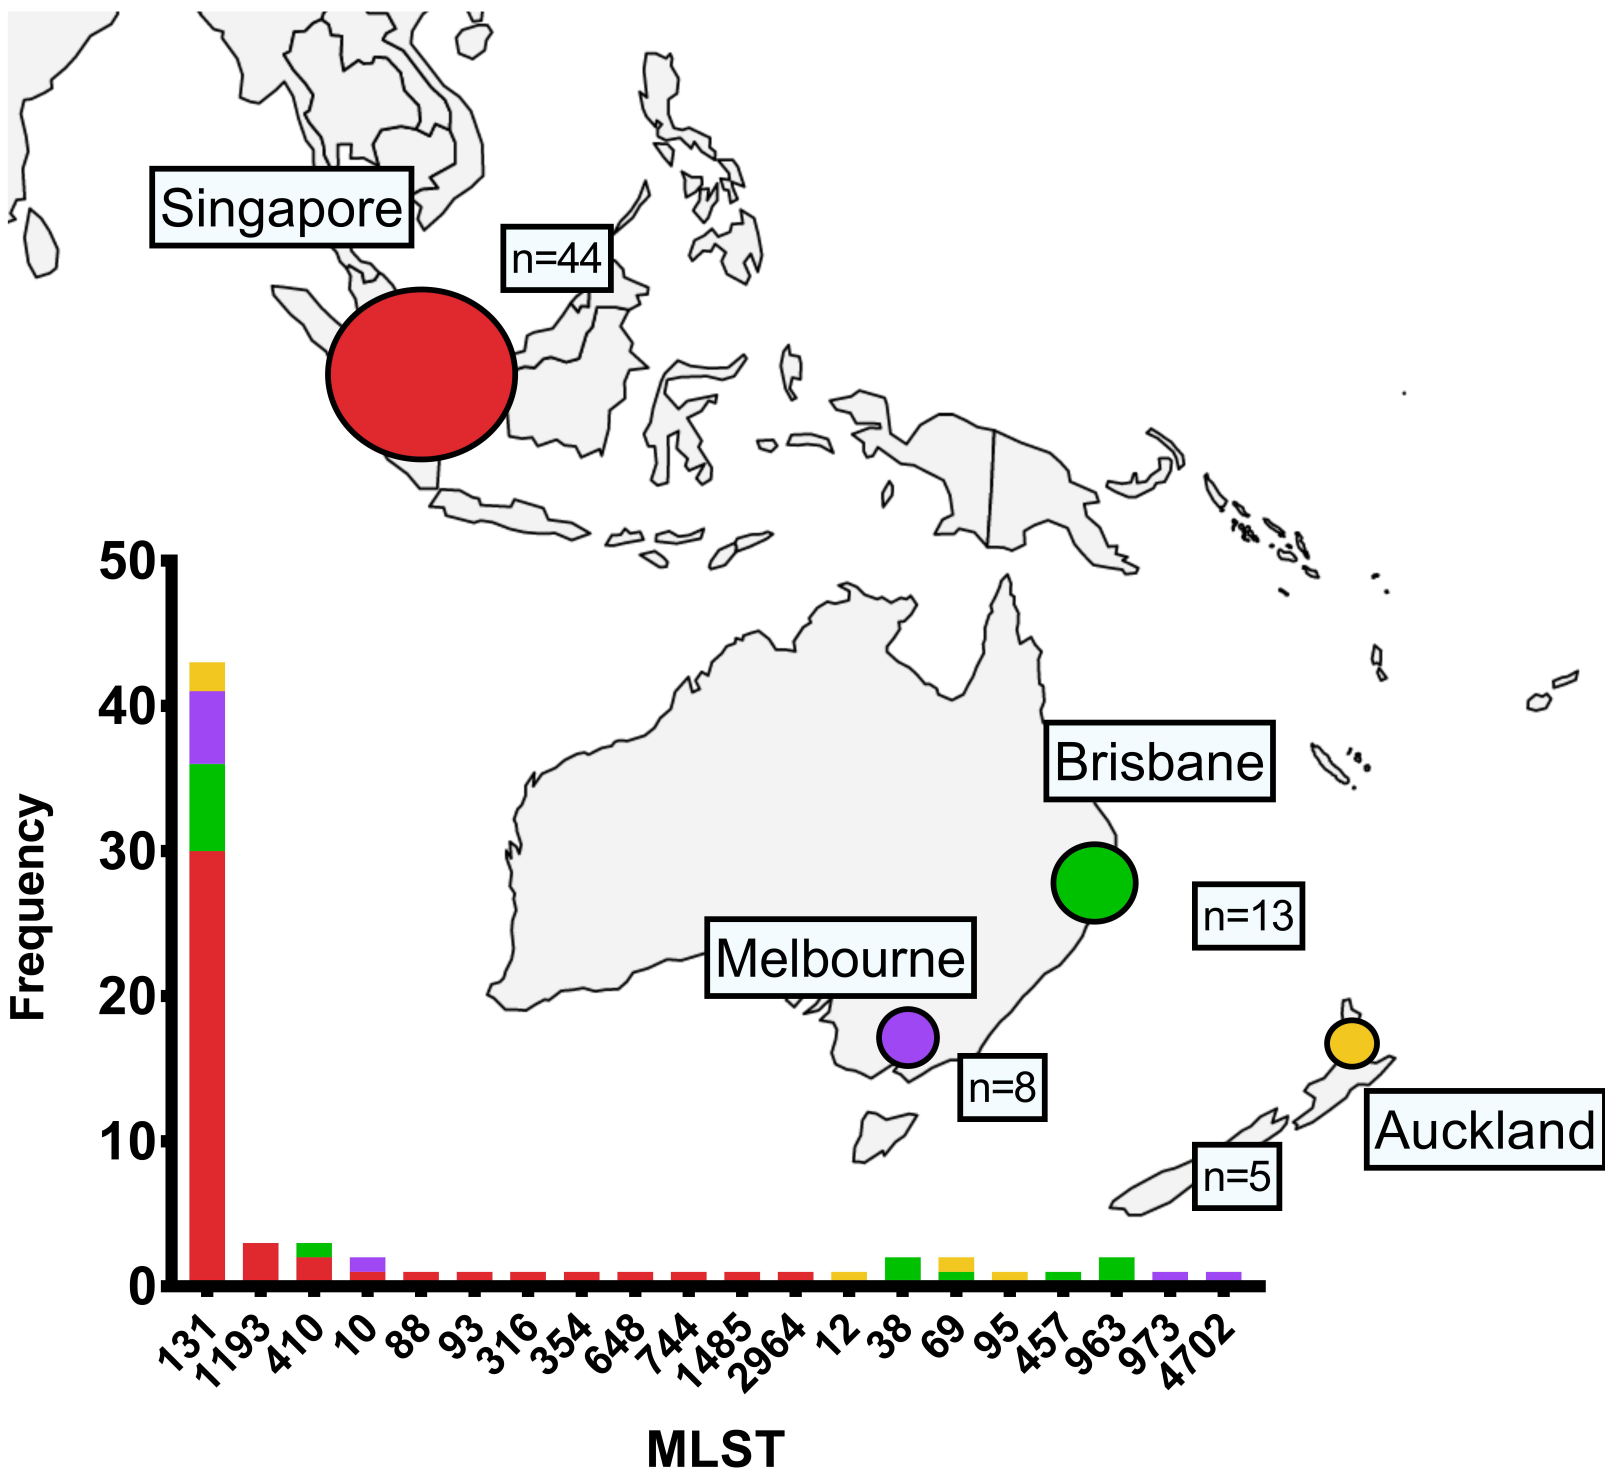

0.1

ST-131 Clade

- clade A
- clade B
- clade C1
- clade C2

Location

- Site A (Singapore)
- Site B (Singapore)
- Site C (Brisbane, Aus)
- Site D (Brisbane, Aus)
- Site E (Melbourne, Aus)
- Site F (Melbourne, Aus)
- Site G (Auckland, NZ)

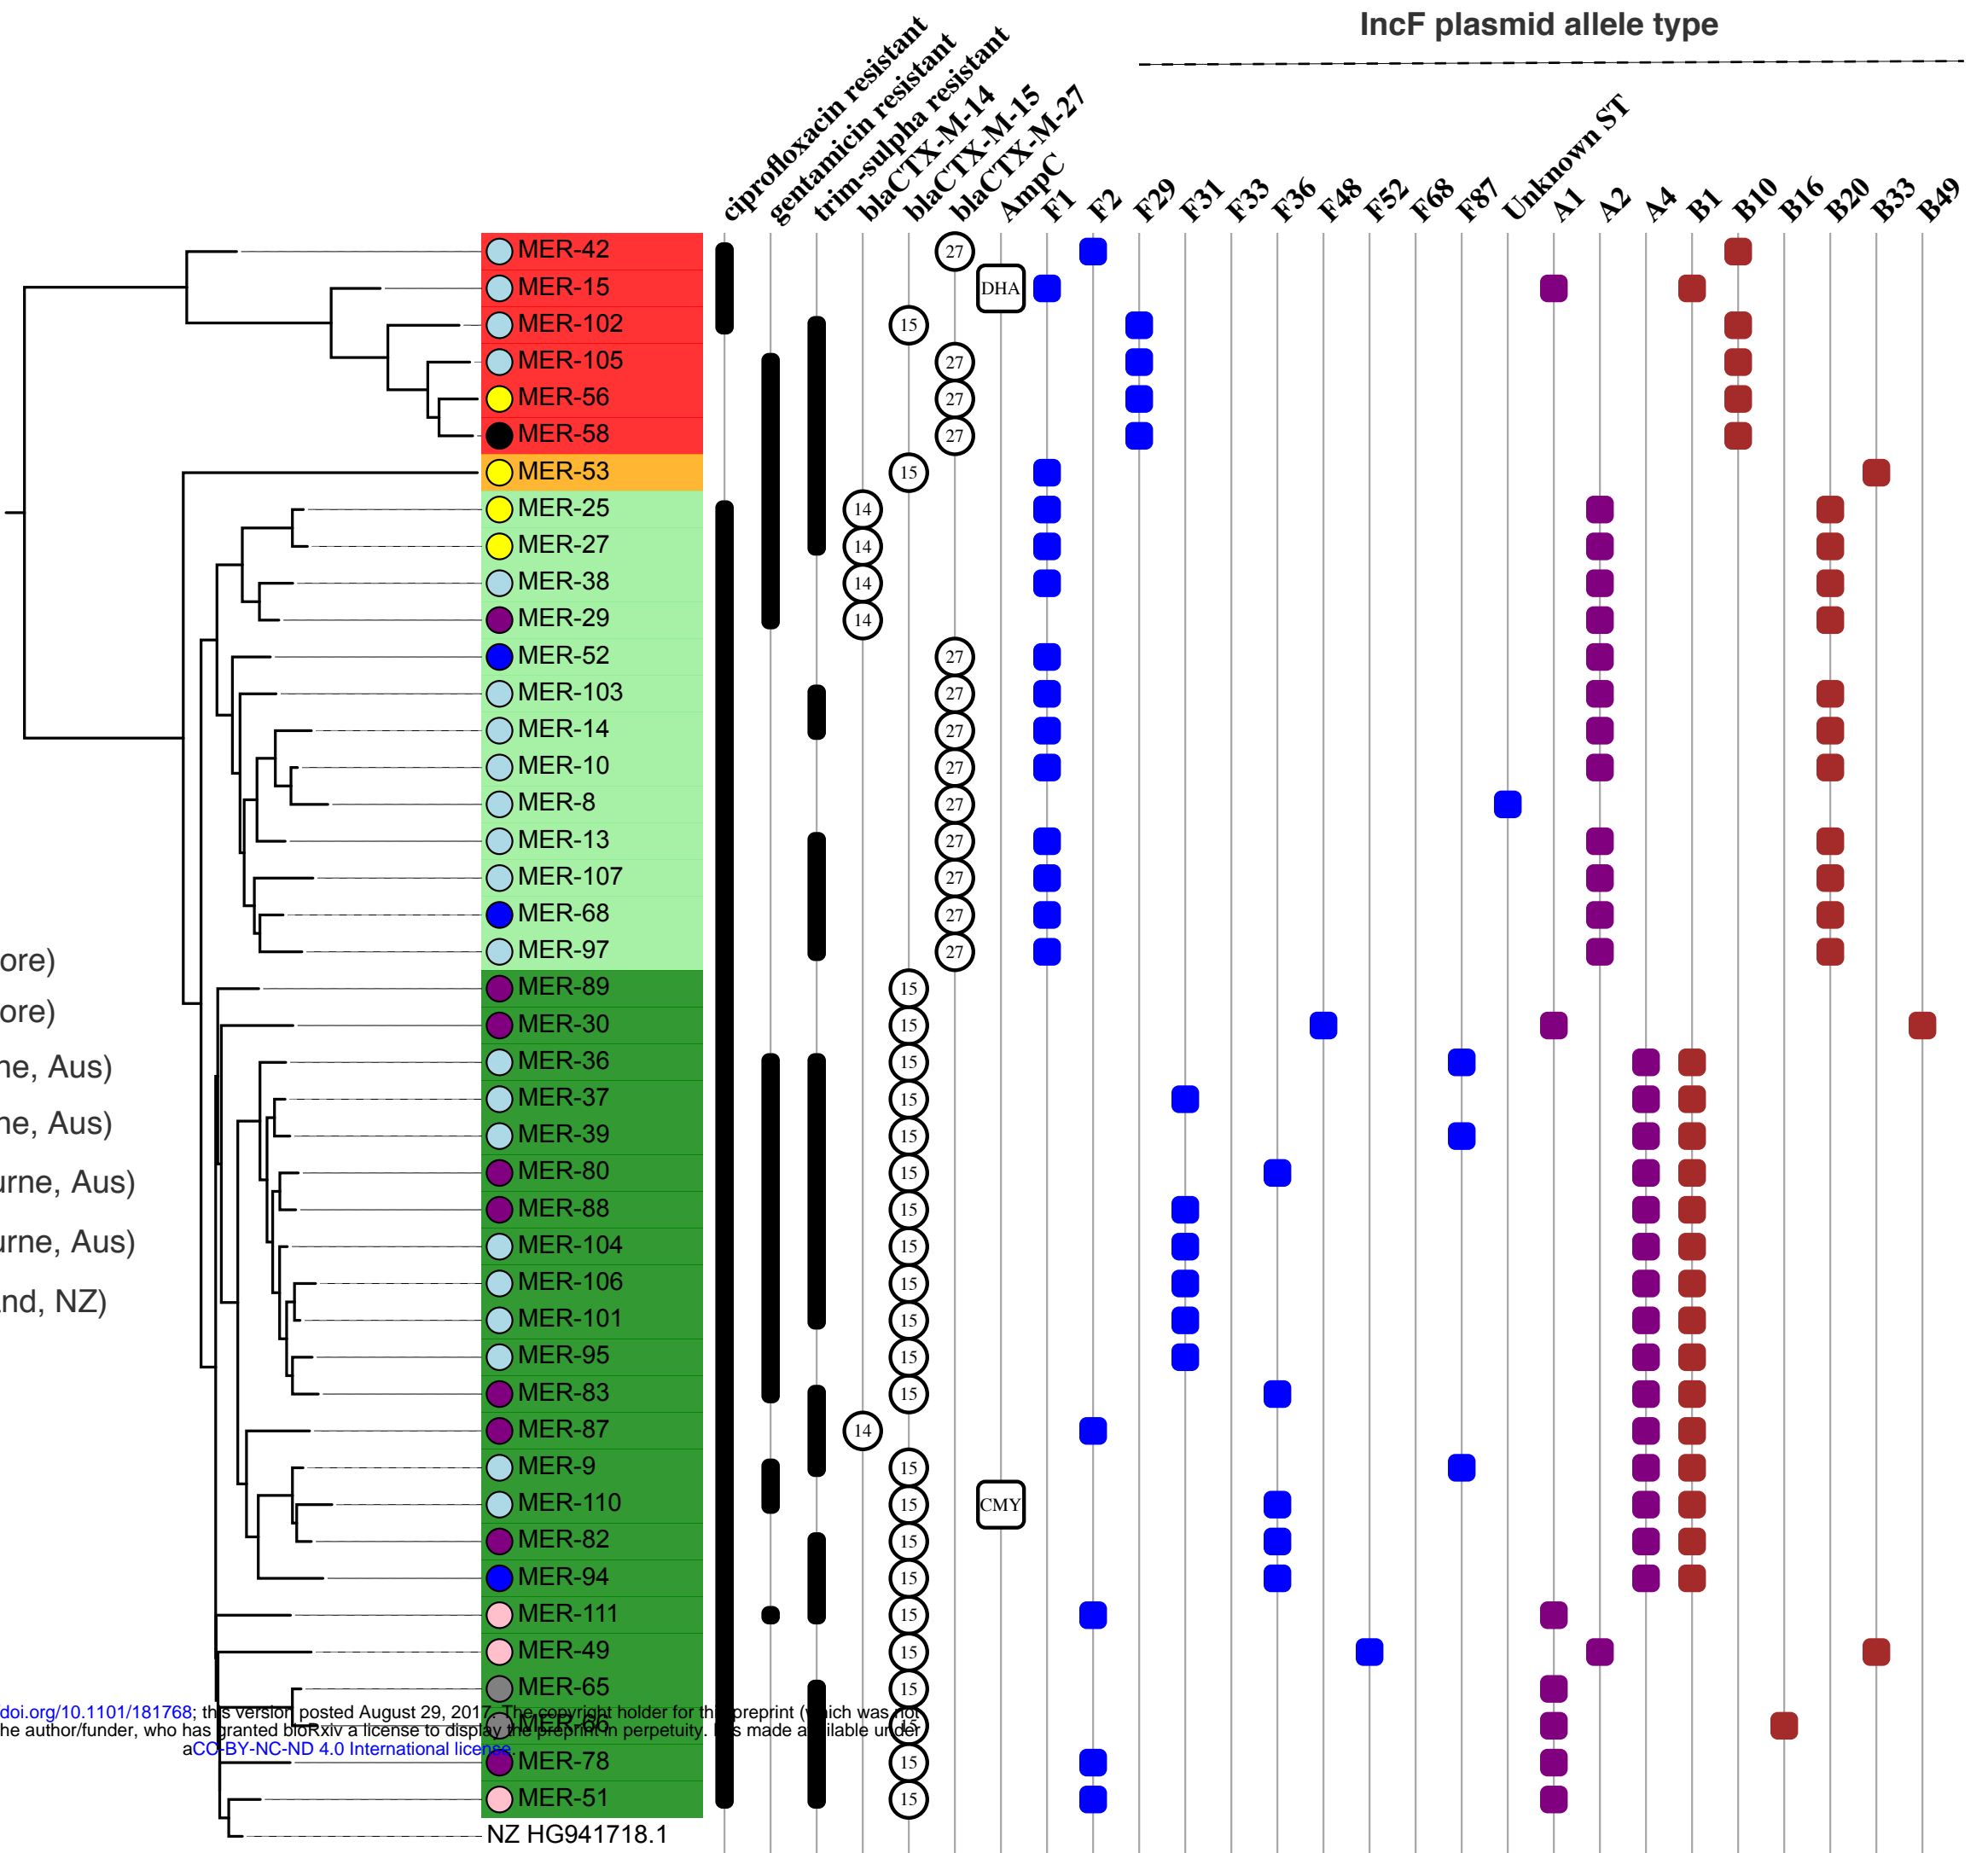

bioRxiv preprint doi: <https://doi.org/10.1101/181768>; this version posted August 29, 2017. The copyright holder for this preprint (which was not certified by peer review) is the author/funder, who has granted bioRxiv a license to display the preprint in perpetuity. It is made available under aCC-BY-NC-ND 4.0 International license.

NZ HG941718.1

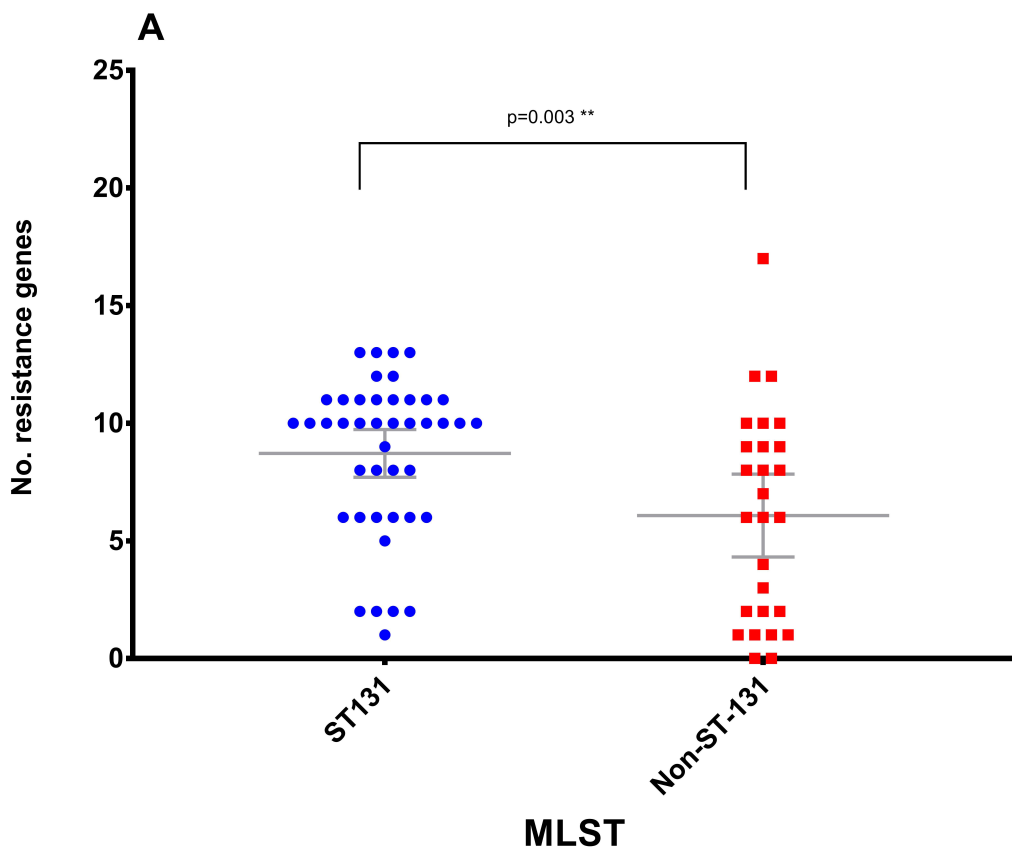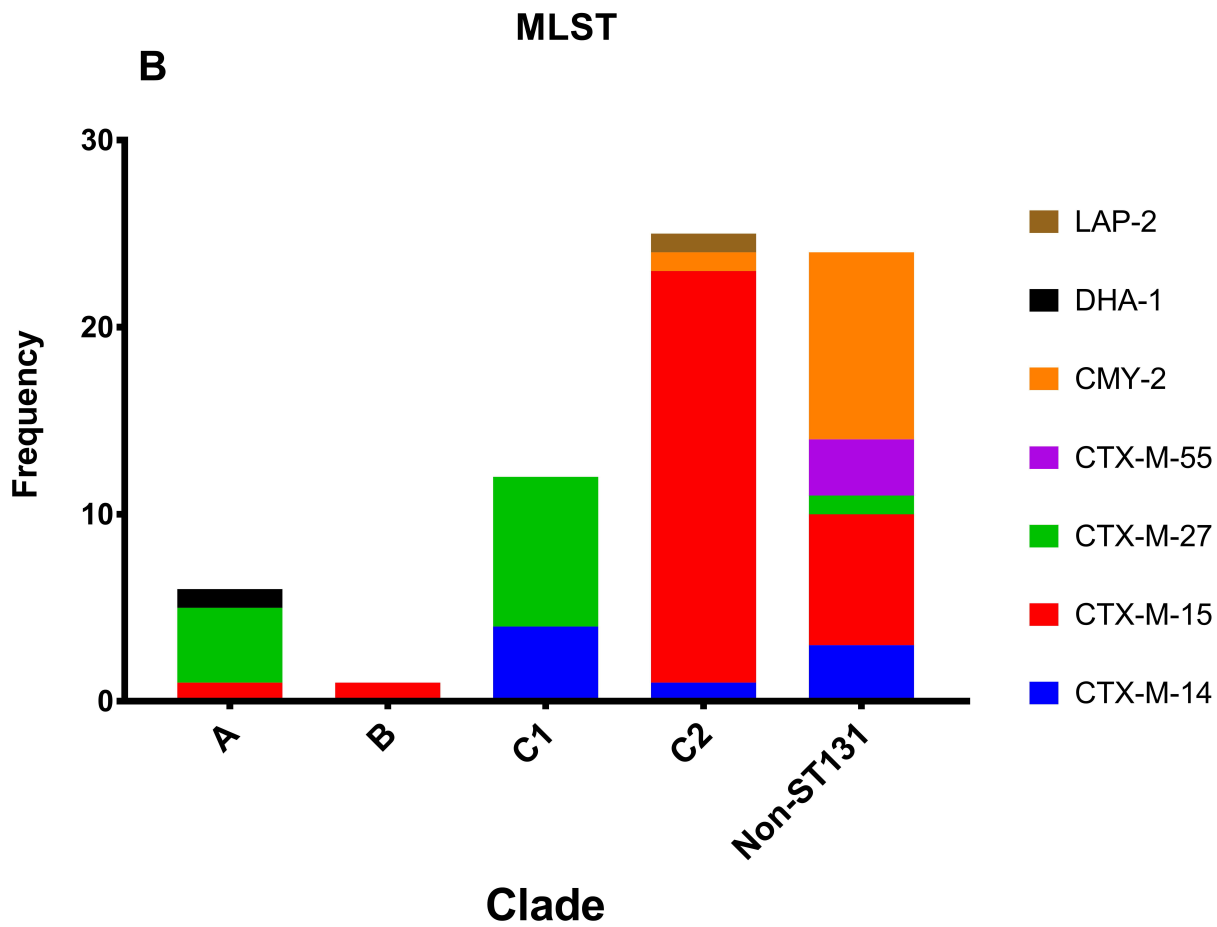

Source: http://www.biorxiv.org/content/10.1101/181768v1.full.pdf
